# Supplementary material for: Analyzing Gluten Content in Various Food Products Using Different Types of ELISA Test Kits
Source: PubMed Central journal article supplement (PMC7825509; doi:10.3390/foods10010108), 2021-01-06
Supplement: foods-10-00108-s001.pdf [file foods-10-00108-s001.pdf]

## Supplementary File

**Table S1.** Concentration of gluten in gluten-containing products using three types of sandwich ELISA test kits

| Type of Food | Product            | Gluten Concentration of Samples (g/kg) |                         |                          |
|--------------|--------------------|----------------------------------------|-------------------------|--------------------------|
|              |                    | RIDASCREEN<br>(R5 ELISA)               | Veratox<br>(G5 ELISA)   | AgraQuant<br>(G12 ELISA) |
| Bread        | Plain bread        | 40.2 ± 0.1 <sup>a</sup>                | 27.6 ± 0.4 <sup>b</sup> | 24.0 ± 0.4 <sup>c</sup>  |
| Noodles      | Buckwheat soba     | 72.6 ± 1.0 <sup>a</sup>                | 43.2 ± 3.5 <sup>c</sup> | 48.3 ± 0.6 <sup>b</sup>  |
|              | Instant noodle     | 35.3 ± 1.9 <sup>a</sup>                | 12.0 ± 0.4 <sup>c</sup> | 27.9 ± 0.4 <sup>b</sup>  |
|              | Plain noodle       | 45.3 ± 1.5 <sup>b</sup>                | 43.7 ± 5.8 <sup>b</sup> | 53.0 ± 0.7 <sup>a</sup>  |
|              | Spaghetti noodle   | 16.9 ± 3.7 <sup>a</sup>                | 3.7 ± 0.3 <sup>b</sup>  | 20.9 ± 0.2 <sup>a</sup>  |
|              | Udon noodle        | 25.5 ± 1.4 <sup>b</sup>                | 6.5 ± 0.4 <sup>c</sup>  | 30.3 ± 1.2 <sup>a</sup>  |
| Powder       | Soft wheat flour   | 47.3 ± 1.3 <sup>a</sup>                | 23.0 ± 2.0 <sup>c</sup> | 34.0 ± 0.1 <sup>b</sup>  |
|              | Strong wheat flour | 86.9 ± 2.0 <sup>a</sup>                | 51.2 ± 6.1 <sup>b</sup> | 58.5 ± 1.1 <sup>b</sup>  |

All values are denoted as mean ± standard deviation ( $n = 3$ ). <sup>a-c</sup> within a row, different letters represent significantly different values ( $p < 0.05$ ).
